# Supplementary material for: Effects on longevity extension and mechanism of action of carnosic acid in Caenorhabditis elegans
Source: Royal Society of Chemistry journal article supplement (doi:10.1039/c8fo02371a), 2019-01-01
Supplement: c8fo02371a1.pdf [file c8fo02371a1.pdf]

## Supplementary Information

### Effects on longevity extension and mechanism of action of carnosic acid in *Caenorhabditis elegans*

Chunxiu Lin<sup>abc</sup>, Xiaoying Zhang<sup>abc</sup>, Jie Xiao<sup>abc</sup>, Qiqi Zhong<sup>abc</sup>, Yong Kuang<sup>d</sup>, Yong Cao<sup>abc\*</sup>, Yunjiao Chen<sup>abc\*</sup>

#### 1. The properties of the mutants used in the study were as follows:

(1) The *daf-16(mgDf50)* null mutant strain lacks the fork- head family transcription factor that is regulated by the IIS pathway.

(2) CF1553 {*muIs84 [pAD76 (sod-3::gfp)]*} is a transgenic GFP reporter strain that could reflect the level of *sod-3*, encoding a manganese superoxide dismutase in *C. elegans*.

(3) AM140 {*rmIs132[P(unc-54) Q35::YFP]*} drives Q35::YFP expression via the myosin promoter of myoblast myocytes and expresses the polyQ repeat expansion mutation of the YFP fusion in somatic muscle cells.

(4) CL4176 {*dvIs2[pCL12(unc-54/human A $\beta$ <sub>1-42</sub> minigene)lpRF4]*} drives A $\beta$  micro gene expression of A $\beta$ <sub>1-42</sub> via the myosin promoter of myoblast muscle cells.

(5) The *skn-1(zu67) IV/nT1(IV;V)* null mutant strain lacks SKN-1 transcription factor, which is responsible for the expression of various stress genes promoting oxidative stress resistance.

(6) The *hsf-1(sy441)I* null mutant strain lacks heat-shock transcription factor which can mediate enhanced ascaroside pheromone biosynthesis in response to heat stress by activating the peroxisomal fatty acid  $\beta$ -oxidation genes.

## 2. Supplementary Table

**Table S1 Primer sequences for qRT-PCR analysis**

| <b>Gene</b>     | <b>Primer</b>                |
|-----------------|------------------------------|
| <i>hsp-16.1</i> | CTGAATCTTCTGAGATTGTAAAC (F)  |
|                 | TTTGTTCAACGGGCGCTTGC (R)     |
| <i>hsp-16.2</i> | CTGCAGAATCTCTCCATCTGAGTC (F) |
|                 | AGATTCGAAGCAACTGCACC (R)     |
| <i>sod-3</i>    | CCAACCAGCGCTGAAATTCAATGG (F) |
|                 | GGAACCGAAGTCGCGCTTAATAGT (R) |
| <i>sod-5</i>    | GAACTGCTGTCTTCGGAAGT (F)     |
|                 | CCATGAAGTCCTGGTGACAAT (R)    |
| <i>daf-2</i>    | GGATAAAGGCGAATCAAAGTGTC (F)  |
|                 | CGATACACTTCCCTTGTGATAGAC (R) |
| <i>daf-16</i>   | CTTCAAGCCAATGCCACTACC (F)    |
|                 | GGAGATGAGTTGGATGTTGATAGC (R) |
| <i>hsf-1</i>    | TTGACGACGACAAGCTTCCAGT (F)   |
|                 | AAAGCTTGCACCAGAATCATCCC (R)  |
| <i>skn-1</i>    | GACGTCAATTTATGGAGTGTCG (F)   |
|                 | GAAGATGTTTTGTCGTGATCCG (R)   |
| <i>sek-1</i>    | TTATGGAGCAGGCAAGAAATG (F)    |
|                 | AAAGACTTGTCGCCATTCG (R)      |
| <i>act-1</i>    | TCCAAGAGAGGTATCCTTAC (F)     |
|                 | CGGTTAGCCTTTGGATTGAG (R)     |
